# Supplementary material
Source: publisher figshare collection journal article supplement (https://gsajournals.figshare.com/ndownloader/files/21399321)
Supplement: Supplementary file 1 [file 21399321]

#!/usr/bin/env Rscript

setwd("~/Final_LD_and_STRUCTURE_Analyses/LD_Analysis")

library(ggplot2)

genData_all <- read.table("Chr1_50K_GBS_TAGS_MAF_0.1_pairwise_R2.txt", header=TRUE,sep="\t")
genData_all <- genData_all[,c("Dist_bp","R.2")]
genData_all$Dist_mb <- as.numeric(genData_all$Dist_bp)/1000000
genData_all <- genData_all[,c("Dist_mb","R.2")]
genData_all <- genData_all[complete.cases(genData_all),]
chr1_background <- read.table("~/Background_LD_Calculations/Chr1_75th.txt",header=F)
chr1_background <- chr1_background[1,1]

#Using equation from Hill and Weir 1988. R code from Fabio Marroni - https://fabiomarroni.wordpress.com/2011/08/09/estimate-decay-of-linkage-disequilibrium-with-distance/ Also published in this paper: Marroni et al (2011) Nucleotide diversity and linkage disequilibrium in Populus nigra cinnamyl alcohol dehydrogenase (CAD4) gene. Tree Genetics & Genomes, DOI 10.1007/s11295-011-0391-5.

#n is the number of chromosomes sampled
n <- 748
HW.st <- c(C=0.1)
x <- genData_all$Dist_mb
y <- genData_all$R.2

HW.nonlinear<-nls(y~((10+C*x)/((2+C*x)*(11+C*x)))*(1+((3+C*x)*(12+12*C*x+(C*x)^2))/(n*(2+C*x)*(11+C*x))),start=HW.st,control=nls.control(maxiter=100))

tt<-summary(HW.nonlinear)
new.rho<-tt$parameters[1]
fpoints <-((10+new.rho*x)/((2+new.rho*x)*(11+new.rho*x)))*(1+((3+new.rho*x)*(12+12*new.rho*x+(new.rho*x)^2))/(n*(2+new.rho*x)*(11+new.rho*x)))

df_all <- data.frame(x,fpoints)
df_all$Lines <- "all"
decay.distance_all <- df_all$x[which.min(abs(df_all$fpoints-chr1_background))]

chr1_decay <- ggplot(df_all, aes(x=x, y=fpoints)) + geom_line() + geom_hline(yintercept=chr1_background, color="firebrick4", linetype="dashed") + xlab("Distance (Mb)")+ ylab(expression(paste("R"^"2")))+ theme(axis.title.x=element_text(face="bold",size=16),axis.title.y=element_text(face="bold",size=16),axis.text.x=element_text(size=14,color="black"),axis.text.y=element_text(size=14,color="black"),plot.title=element_text(face="bold",size=16),panel.grid.minor=element_blank())+ggtitle("1H")+ xlim(0,100) + ylim(0,0.2)

ggsave("chr1_decay_mb.jpg",units="in",dpi=300,width=5,height=5)
